# Supplementary material
Source: PubMed Central journal article supplement (PMC6668020)
Supplement: NIHMS937405-supplement-1.pdf [file NIHMS937405-supplement-1.pdf]

## SUPPLEMENTAL RESULTS

**Supplemental table 1:** Table listing sequences of all smFISH probes used in this study.

(☼) denotes the position of the fluorophore in the sequence.

| Probe name | mix | Sequences (☼5' → 3') |
|------------|-----|----------------------|
|------------|-----|----------------------|

|                                                              |                                                                                                                                                                                                                                                                                                                                                                                                                                                                                                                                                                                                                                                                                                                                                                                                                                                                                                                                                                                                                                                                                      |
|--------------------------------------------------------------|--------------------------------------------------------------------------------------------------------------------------------------------------------------------------------------------------------------------------------------------------------------------------------------------------------------------------------------------------------------------------------------------------------------------------------------------------------------------------------------------------------------------------------------------------------------------------------------------------------------------------------------------------------------------------------------------------------------------------------------------------------------------------------------------------------------------------------------------------------------------------------------------------------------------------------------------------------------------------------------------------------------------------------------------------------------------------------------|
| <i>gcl</i> mRNA<br>48 probes<br>Quasar670                    | gatcccactattgacccat, ctacagcgacgttcatatgca, aaagatgaatcagtgctgcg, tttttgggctgagtggtg, ctgggtgtagtaagaagtt, tgaagagcgcttctgatatg, acatccgagttctttcctc, cttatccagagccatgacag, tacaccttatgcaggtgcca, gaagatggactctggctca, cacgtcccattgaacatag, atgaaattctgctgggcttc, gtcgtccaggattgtgatct, atggaaccaaagacagcatc, cgatttcgatctcatcggaa, accgagataaacatctgctga, ttccgtctaagtgaacaac, atgttatccaccatcacctc, aatactggatagctgtctcc, aaaggtggacttcttgactc, agcagattgatctggaacca, caggttcgggtgcttactat, atcagctcaatggagatgtg, tcacatacaaatcgggactg, tagagtgtacagcgagaact, agtcgtaggaacatccatgt, aaaagctcctgctgtcttag, aaagtatgtccactggacga, aagacctcacataaggctg, gtactgggttcgtagcttct, agatccatgtagtggttggt, gccactccttgggtataata, tggttgtaatgtgcccagata, gatacgtagtaatgcatccc, tacaatcctcctgcccagta, aaagaactgctcatcgtcca, atccatgccaaagttgaagc, aatgttcagctacgcgag, atgaaactgctgttcgtctg, tttatcgaggtcaccgtggt, agaacagatctcggacgttt, ttgggtctaacaccatgag, gcattaccaccagcatggtt, gcattaccaccagcatggtt, tccttgaactctgattcgg, tatggagagagaggtgtcg, ttgctccgatttccgaaatg, tgaaaacggcccgaatcatca |
| <i>gcl</i> (1 <sup>st</sup> third)<br>32 probes<br>Quasar670 | ggctctccaaatcttttagt, ttatctctgtttgctgacg, catttcaattccgttcgctg, ctgattaggcatgcccgttta, acacgggctaaaattctacg, ttacttggtctgtttcaat, gccgtactttatataacag, actgtaaaactgcagttac, atggctgagcgcaggaattc, catggtatcccactatttgac, acacctcagcgacgttcata, gcttccgcttccgtcgattg, cccaaagatgaatcagtgct, gcgcttgtatgtactgg, ccgagttctttcctcctg, cttatccagagccatgacag, gtacacctatgcaggtgcc, tagaagtatggactctggct, ccacgtcccattgaacatag, atgaaattctgctgggcttc, gtcgtccaggattgtgatct, ccaggctagcaacgggtgatc, tacatggaaccaaagacagc, gctgactcgatttcgatctc, ggccaataccgagataacat, tctaagtggacaacagtgcc, ggcacactgtcgtgatgattc, ccggactaatgttatccacc, tcgtaatactggatagctgt, cacaccgtactggcagggcg, aggtggacttcttgactccg, agattgatctggaaccactg                                                                                                                                                                                                                                                                                                                                                             |
| <i>gcl</i> (2 <sup>nd</sup> third)<br>31 probes<br>Quasar670 | cggttgcttactataaatgc, atggagatgtgcctaagcag, ggtcagggcactcatcagct, ggtcagggcactcatcagct, gcatacacatacaaatcggga, cagtagagtgtacagcgaga, gtcgtaggaacatccatgctg, ctctggatcgtagtcgggat, aaaagctcctgctgtcttag, ctggacgacatcaccactag, agcggctggtaaagtatgct, gccaaagacgagcgttctc, aagacctcacataaggctg, gtactgggttcgtagcttct, gatccatgtagtggttggtc, cttgggtataatattgtca, ttgtgaatgtgccgatacag, acgtagtaatgcatcccag, gaggactacaatcctcctgc, aactgctcatcgtccagctg, gcatcgcagcagttctcaa, caggctcaagcaacatacgt, gtccagcggcacttctggta, atccatgccaaagtgaagc, gcgagtcgatcaggtgatg, gtgccgacgaatgttcagtc, taagcactcgtcgtgctcg, atgaaactgctgttcgtctg, gtttatcgaggtcaccgtgg, gaacagatctcggacggttg, ctgcttctttcgaggctaa, tctaacaccatgagtgccac                                                                                                                                                                                                                                                                                                                                                              |
| <i>gcl</i> (3 <sup>rd</sup> third)<br>28 probes<br>Quasar670 | gagaagtggatgcaccaact, accaccagcatgtttattga, ttgaaactctgattcgggtg, ctgctgagcgggaacaattt, ccgatttccgaaatgggtat, cagcggctgtcgtggttg, gaatcatcagcactggacgg, gctcagagtcaccaatgaaa, gaccaagcagattctgggccg, gattgcgcccgttctgctag, tgctcagcagccagttgct, attggttgggtgactgctc, ctgcccggtaaatgaacaaaa, aaacaactacaacgagcccg, gcgatggcgataaacgaatt, gagtgatcagccgtagctaa, tcgatgtacaaacgctaga, acgattgcggatagcttat, atatagatctgcgcattcca, gcgtcattacatgatactag, ccatttaagttagtgacgta, ggcactagagtgtgctgta, ttgcaacgcctacatattgt, atttcttggccggttttt, aacttgcaggattcgaagac, gggacagtaattacatgctg, ctgtgcgtacattagcag, tgatcactcaaggaatag                                                                                                                                                                                                                                                                                                                                                                                                                                                          |
| <i>nos</i> mRNA<br>48 probes<br>CAL Fluor 590                | ggtaaagctacgcgccaact, acggcaatccaggaatgtt, acttgaacaactgcgaagc, aaaatcgtatgtcccttaga, aaatcgtgacgcagaggcaa, aactaaactcgttttgggt, ttccgatacttcttatct, gcacagtttattcaactgaa, caaatcctcacccaaaaacc, ttatcgcgcactctacttcc, aaatccgggtcgaaagtac, taaacgctgcaaaagctgcc, gctttgatcggaaatgcgtat, ccaggcgtatttaaacgtt, gcacgggataacgctctaaa, agtgatcgttcgttctat, gtttccctttcacagaaaca, gccacgacgattgaacaagt, tcattcatcaactttcgga, aaatgaaggcgaccagttgc, cgaaattttcggccgaag, ttcaaagtgttctttttca, tgatacagattgacagttcga, ctgctatttcttttagcaa, acaatgaatgcgtagccgac, tactcttcgcttatctatca, gcgggtgttcatgtgtgaa, cgagccattgaattttcat, aaccttctttatttggca, tccaagtgtcgcggaacat, tccttggcgtgaaaagcag, tgcaggcccagaatgttgag, ccactggtatccaaatacat, gtaatggcggactcaaagt, tcggccagaaaaggggaagt, cataaggagcgaattggcgg, caagtggtagtggtactgtc, ttgctggtgactcgcactag, aaggatcgcgcaatctcgtc, cgtaacctgcgcaaagatt, catagccattggtcgcgaac, taggacatgcgaccgagatc, cattaagttgcccagcattgg, agtgggtggcgagtggaatg, cacacgtgttcagatgctc, ggctggtatatacagatgt, ctgcaaacccattgtattgg, cgagattgggtgacacagtg            |
| <i>osk</i> mRNA<br>48 probes<br>CAL Fluor 590                | cgcgacggatataatggtg, cacctcactatctatcgg, atatcgtgattccattctg, cgatattcactcttgatgct, tgcagtggaatggattgcc, caggaaatccgtcacgtgtg, cagcgggtcacattgggaatg, tcgcttccaggtggaagatc, aggaggtgaccgttctcag, tttctggtgagcaccat, tatgttctccagggacggag, gtttgaagggttctccag, ggtgtcagctgggacagag, cttttcatccgttatctgg, catttgatcagcgaaccg, agatgcttccaattatcctg, ggcttgcgtgtagaaattgt, gcatttttggcgcatttacg, gctgtagatgttgatgggta, caggtggagccaaattgatt, ttttctgcttgggttctg, caaatggcggtttctcagtc, gccgttfaatggatgcacaa, tggcgtcttctcattatgtt, gttaaaatcgttggcgtggg, agaatcgtttaggttccac, aatccgagttaatcgtcagc, aagtcagcagatagggatc,                                                                                                                                                                                                                                                                                                                                                                                                                                                                |

|                                                       |                                                                                                                                                                                                                                                                                                                                                                                                                                                                                                                                                                                                                                                                                                                                                                                                                                                                                                                                                                                                                                                                                          |
|-------------------------------------------------------|------------------------------------------------------------------------------------------------------------------------------------------------------------------------------------------------------------------------------------------------------------------------------------------------------------------------------------------------------------------------------------------------------------------------------------------------------------------------------------------------------------------------------------------------------------------------------------------------------------------------------------------------------------------------------------------------------------------------------------------------------------------------------------------------------------------------------------------------------------------------------------------------------------------------------------------------------------------------------------------------------------------------------------------------------------------------------------------|
|                                                       | <p>aaaatcatcgcccataagcg, tccattcgggagagatatag, acgcctaataatcggcatttta, caaagtctgactgcaggac, attgatcgtagtccggata, tgagtacctcgggtaattg, ccgatccgatattgacgatg, gatctgaaccaaaggcttgc, tcagtagccgaaaatcgtgc, accaatcgcatattgtgcat, gcggtgcaagattgttaga, ttatcgtgacaatagttgcc, atcggtagattttgtcacat, gcattcgttcggataaact, atgtcgatgacctttagggtg, cctttcgttgattagacagg, agcaatcaaatcgaccacg, gatagggctccttggaaaccg, cgaccgattttgtccagaa, caataacttgcagtagcgcg</p>                                                                                                                                                                                                                                                                                                                                                                                                                                                                                                                                                                                                                               |
| <p><i>gcl</i> red<br/>45 probes<br/>Quasar 570</p>    | <p>tccaaatcttttagttatgg, ttccgttcgctgcaatttt, aattctacgagctgctgatt, cggtcactggcttcgtttca, gagcgcaggaattcttact, cagcgacgttcatatgcatg, cccaaagatgaatcagtgct, ccgagttcttttctccttg, gtacaccttatgcaggtgcc, ccacgtcccattgaacatag, gtcgtccaggattgtgatct, tacatggaaccaaagacagc, ggccaataaccgagataacat, ggcaacttgcgatgattc, cggcctcgttaactggata, attgatctggaaccactgaa, gatgtgcctaagcaggttcg, tacaatcgggactggcggg, atgtgcgtagtagtgatg, cgggtcctctggatcgtagt, ctggacgacatcaccactag, gccaaagaacgagcgttcctc, gtactgggtcgtagcttct, ccttgggtataatattgtca, acgtagtaatgcattcccagt, aactgctcatcgtccagctg, caggctcaagcaacatacgt, atccatgccaaagtgaagc, gtgccgacgaatgttcagtc, atgaacttgcgtttcgtctg, gaacagatctcggacgtttg, tctaaccatgagtgggcac, accaccagcatgtttattga, ctgctgagcggaaacaattt, cagcgggtctgctgctgtttg, gctcagagtcaccaatgaaa, cgccagttgtccgagattg, ctgcccggtaaatgaacaaaa, gcgatggcgataaacgaatt, tcgatgtacaaacgcttaga, atatagatctgcgcatcca, ccatttaagtagatgacgta, ttgcaacgcctacatattgt, aactgcaggattcgaagac, ctgtgcgtacatttagcgag</p>                                                                |
| <p><i>gcl</i> green<br/>45 probes<br/>Quasar 670</p>  | <p>ctctgttttgcagcttgg, catgcggtttaagccatttc, aaataaaataaacacgggct, cagttacagtgccgtacttt, tcccactatttgaccatgg, ctccgtcgtattgtgtaaca, gcgccttgatagtagctg, cttatccagagccatgacag, tagaagtaggactctggct, atgaaattctgctgggctc, ccaggtagcaacgggtgatc, gctgtagcagattcgtatctc, tctaagtgaacaacgtggc, ccggactaatgttatccacc, gttggactcttgactccgac, gcttactataaatgcttagc, gggcaactcagctcaatg, cgagaactccgtctgcatca, ggatgcagtcgtaggaacat, aaaagctcctgcgtctttag, agcggctggtaagtagtgc, aagacctcacataaggctg, gatccatgtagtggtggc, ttgtgaatgtgccgatacag, gaggactacaatcctcctgc, gcatcgcatgcagtttcaa, gttccagcgcacttctggta, gcgagtcctgatcaggatg, taagcactcgtcgtgctgc, gtttatcgaggctaccgtgg, ctctgtttttcgaggctaa, gaagtggatgaccaacttt, ttgaaactctgattcgggtg, ccgatttccgaaatgggtat, gaatcatcagcactggacgg, ctgaccgaccaagcgattct, atgggttgggtgactgctc, aaacaactacaacgagcccg, gagtgatcagccgtagctaa, acgattgcggatagcttat, gcgctattacatgatactag, ggcaactagatgtgcgtcta, atttctttgccgctttttt, gggacagtaattacatgcgt, tgatcactcaaggaatagt</p>                                                                            |
| <p><i>gcl</i> intron<br/>48 probes<br/>Quasar 570</p> | <p>aaacaaggtacacaaagggg, ctaacgaacgacgcaaaaact, gcagttaatccgcagctata, tatatccccatgttctctggc, gatatggaaaacggaccacc, ttgtttggccctgataacac, aacgcttattacgatggcc, aatcagctgattgacagct, cagataaggctacaagcagc, aaatttggagctccgaaat, agttgccttagacgactgag, gcaactgattcgtagggat, ggagactcgaactcgaactc, gaagaagccaacaagcatgg, ccaaggagtaaacggctaaa, aggaggattgtccactttt, ttcgaaatgtatcatccgga, ttatctactgcaccttggg, acaagttttcagcgttgaca, aagtgcatttccaaacgatt, gtgcctgaagctttgtttc, ccgagtttccaaaagtcgta, gatgaccaagaccaccaaac, attacgtcaccactgaagc, caaaacaagacgattgcagc, tccaaagcgtgtatttctt, aagagtagtgttccaaaccg, ggacgcagactaagcataaaa, gacagctcggactatggat, ggatctcattgatatgggcg, aacaatcaaaccggacgcttt, atagtgtatttctgccc, tggaaagctactgactactaca, tgatgaacctatgcaaggc, gttgtgtttatgctttggcg, aatgagatcaaacgagctcg, tagcgcaaacatatttgggt, aagcgattttaaagcactga, aagaaacagagaagcatccg, ggtcgacaaaatgcaattca, cgcaataagcccagactaa, gcgatgctcggaaaacttaa, ggaaagcgcattccata, cgactttacaggccctaaaa, agtttcattccgccaactg, cctcaatggaaccagttgac, ctgacagattgcggtgtgat, aaaaatgcggctggttatcg</p> |
| <p><i>gcl</i> 3'UTR<br/>48 probes<br/>Quasar 670</p>  | <p>ttgtgaatgtgccgatacag, acgtagtaatgcattcccagt, gaggactacaatcctcctgc, aactgctcatcgtccagctg, gcatcgcatgcagtttcaa, caggctcaagcaacatacgt, gtccagcgcacttctggta, atccatgccaaagtgaagc, gcgagtcctgatcaggatg, gtgccgacgaatgttcagtc, taagcactcgtcgtgctgc, atgaacttgcgtttcgtctg, gtttatcgaggctaccgtgg, gaacagatctcggacgtttg, ctgcttctttcgaggctaa, tctaaccatgagtgggcac, gaagtggatgaccaacttt, accaccagcatgtttattga, ttgaaactctgattcgggtg, ctgctgagcggaaacaattt, ccgatttccgaaatgggtat, cagcgggtctgctgctgtttg, gaatcatcagcactggacgg, gctcagagtcaccaatgaaa, gaccaagcgaattcgtggcgg, gattgcgcccgttctgctag, gtctcagcagcggcgtgct, attggttgggtgactgctc, ctgcccggtaaatgaacaaaa, aaacaactacaacgagcccg, gcgatggcgataaacgaatt, gagtgatcagccgtagctaa, tcgatgtacaaacgcttaga, acgattgcggatagcttat, atatagatctgcgcatcca, gcgctattacatgatactag, ccatttaagtagatgacgta, ggcaactagatgtgcgtcta, ttgcaacgcctacatattgt, atttctttgccgctttttt, aactgcaggattcgaagac, gggacagtaattacatgcgt, ctgtgcgtacatttagcgag, tgatcactcaaggaatagt</p>                                                                                       |
